# Supplementary material
Source: Elsevier journal article supplement (https://www.sciencedirect.com/science/article/pii/S2530064420300158)
Supplement: mmc1 [file S2530064420300158:mmc1.xlsx]

## Sheet: TableS1 
Table S1. Database used in the generalized linear mixed-effect models (GLMM). We used these models to examine how fine landscape scale context influence in the number of bird visits in scattered trees. The legend of database is avaliable in Table S2.
ID_large_landscape	ID_fine_landscape	longitude	latitude	time	all_specie	high	medium	low	n_predator	food_resource_flower	food_resource_fruit	nest	tree_size	frag_distance	frag_size	tree_density25	tree_density50	tree_density100	tree_density200	tree_aggregation	forest_cover_amount25	forest_cover_amount50	forest_cover_amount100	forest_cover_amount200
AR	Ba1_AR	379261	7638815	1	0	0	0	0	2	0	0	0	4	79	28	0	1.6	2.22	2.5315	0.78	0	0	2.18039	15.0254
AR	Ba1_AR	379261	7638815	2	1	0	0	1	2	0	0	0	4	79	28	0	1.6	2.22	2.5315	0.78	0	0	2.18039	15.0254
AR	Ba2_AR	379267	7638860	1	0	0	0	0	0	0	0	0	5	121	28	0.11	2.27	1.09	2.01244	-1	0	0	0	6.99939
AR	Ba2_AR	379267	7638860	2	0	0	0	0	0	0	0	0	5	121	28	0.11	2.27	1.09	2.01244	-1	0	0	0	6.99939
AR	Ba3_AR	379372	7638854	1	0	0	0	0	1	1	0	0	6	127	28	1.81	2.67	0.87	0.890113	0	0	0	0	3.71823
AR	Ba3_AR	379372	7638854	2	4	0	0	0	0	1	0	0	6	127	28	1.81	2.67	0.87	0.890113	0	0	0	0	3.71823
AR	Cris1_AR	379517	7638765	2	3	0	0	3	0	0	0	0	5	132	28	14.89	3.88	2.77	1.57326	-1	0	0	0	5.64242
AR	Cris1_AR	379517	7638765	1	3	0	1	2	0	0	0	0	5	132	28	14.89	3.88	2.77	1.57326	-1	0	0	0	5.64242
AR	Cris2_AR	379473	7638807	2	2	0	0	2	0	0	0	1	10	129	28	15.05	3.8	1.36	1.09207	0	0	0	0	4.56586
AR	Cris2_AR	379473	7638807	1	1	0	1	0	0	0	0	1	10	129	28	15.05	3.8	1.36	1.09207	0	0	0	0	4.56586
AR	Cris3_AR	379382	7638757	1	4	0	2	2	0	0	0	1	7	33	28	0	0.64	0.71	1.38646	0.96	0	4.05781	11.2107	18.5036
AR	Cris3_AR	379382	7638757	2	3	0	0	3	2	0	0	1	7	33	28	0	0.64	0.71	1.38646	0.96	0	4.05781	11.2107	18.5036
AR	Ju1_AR	379205	7638920	1	0	0	0	0	0	0	0	2	11	129	28	0.27	2.34	2.14	2.02268	-1	0	0	0	14.4732
AR	Ju1_AR	379205	7638920	2	1	0	0	1	0	0	0	2	11	129	28	0.27	2.34	2.14	2.02268	-1	0	0	0	14.4732
AR	Ju2_AR	379166	7638888	1	1	0	1	0	0	1	0	0	15	94	28	15.2	5.8	3.75	2.71125	0.47	0	0	1.50828	27.7248
AR	Ju2_AR	379166	7638888	2	0	0	0	0	0	1	0	0	15	94	28	15.2	5.8	3.75	2.71125	0.47	0	0	1.50828	27.7248
AR	Ju3_AR	379121	7638835	1	5	0	5	0	0	1	0	0	8	45	28	4.11	5.53	5.53	2.99598	0.85	0	0.552968	25.2219	38.4991
AR	Ju3_AR	379121	7638835	2	8	0	4	2	0	1	0	0	8	45	28	4.11	5.53	5.53	2.99598	0.85	0	0.552968	25.2219	38.4991
AR	Ju4_AR	379093	7638789	1	1	0	0	1	0	0	0	0	5	5	28	14.7	5.15	3.91	2.60866	0.9	0.308928	33.1741	54.4234	39.5993
AR	Ju4_AR	379093	7638789	2	0	0	0	0	0	0	0	0	5	5	28	14.7	5.15	3.91	2.60866	0.9	0.308928	33.1741	54.4234	39.5993
FG	Ba1_FG	380639	7628835	1	0	0	0	0	1	0	0	0	4	241	27	16	11.17	4.93	2.41602	-1	0	0	0	0
FG	Ba1_FG	380639	7628835	2	0	0	0	0	2	0	0	0	4	241	27	16	11.17	4.93	2.41602	-1	0	0	0	0
FG	Ba2_FG	380644	7628764	2	0	0	0	0	0	1	1	0	4	248	27	10.05	3.46	2.62	2.31887	-1	0	0	0	0
FG	Ba2_FG	380644	7628764	1	2	0	2	0	2	1	1	0	4	248	27	10.05	3.46	2.62	2.31887	-1	0	0	0	0
FG	Ba3_FG	380750	7628757	1	0	0	0	0	0	0	1	0	4	154	27	15.27	5.33	5.15	3.02354	-1	0	0	0	2.98253
FG	Ba3_FG	380750	7628757	2	0	0	0	0	1	0	1	0	4	154	27	15.27	5.33	5.15	3.02354	-1	0	0	0	2.98253
FG	Ja1_FG	381519	7628612	1	0	0	0	0	0	0	0	0	9	74	65	15.21	5.95	2.38	1.24025	0.88	0	0	5.15337	16.8575
FG	Ja1_FG	381519	7628612	2	1	0	0	1	0	0	0	0	9	74	65	15.21	5.95	2.38	1.24025	0.88	0	0	5.15337	16.8575
FG	Ja2_FG	381489	7628535	1	0	0	0	0	0	0	0	0	8	18	65	0	0.9	2.38	1.40465	0.96	0.131908	27.9143	35.1311	34.1987
FG	Ja2_FG	381489	7628535	2	4	0	1	1	1	0	0	0	8	18	65	0	0.9	2.38	1.40465	0.96	0.131908	27.9143	35.1311	34.1987
FG	Ja3_FG	381725	7628535	1	1	0	0	1	0	0	0	0	9	0	65	15.06	3.8	2.57	1.89457	0.94	1.02117	56.426	44.5032	36.0865
FG	Ja3_FG	381725	7628535	2	0	0	0	0	0	0	0	0	9	0	65	15.06	3.8	2.57	1.89457	0.94	1.02117	56.426	44.5032	36.0865
FG	Ja4_FG	381694	7628596	2	5	0	0	3	0	0	0	0	10	55	65	6.52	3.26	2.88	1.74003	0.92	0	0	12.631	27.602
FG	Ja4_FG	381694	7628596	1	4	0	0	3	3	0	0	0	10	55	65	6.52	3.26	2.88	1.74003	0.92	0	0	12.631	27.602
FG	Ju1_FG	380830	7628694	1	4	0	2	2	2	0	1	0	6	143	27	9.15	3.4	1.33	1.56348	-1	0	0	0	5.2562
FG	Ju1_FG	380830	7628694	2	0	0	0	0	0	0	1	0	6	143	27	9.15	3.4	1.33	1.56348	-1	0	0	0	5.2562
FG	Le1_FG	381263	7628498	2	1	0	0	1	0	0	0	0	8	84	65	15.02	3.8	1.51	0.859961	0.69	0	0	5.77815	45.7337
FG	Le1_FG	381263	7628498	1	0	0	0	0	0	0	0	0	8	84	65	15.02	3.8	1.51	0.859961	0.69	0	0	5.77815	45.7337
FG	Le2_FG	381236	7628457	1	0	0	0	0	0	0	0	0	13	58	65	15.24	3.81	1.89	0.707065	0.88	0	0	25.1649	53.4215
FG	Le2_FG	381236	7628457	2	3	0	0	2	0	0	0	0	13	58	65	15.24	3.81	1.89	0.707065	0.88	0	0	25.1649	53.4215
FF	Ba1_FF	421342	7629316	2	3	0	3	0	8	0	0	1	6	49	0.6	20.93	14.53	9.14	5.53434	0.82	0	0.97632	13.7319	12.6946
FF	Ba1_FF	421342	7629316	1	4	0	2	2	0	0	0	1	6	49	0.6	20.93	14.53	9.14	5.53434	0.82	0	0.97632	13.7319	12.6946
FF	Ba2_FF	420976	7629491	2	3	0	1	2	2	0	0	0	10	86	26	1.38	4.9	2.69	1.89901	0.81	0	0	6.80556	27.0401
FF	Ba2_FF	420976	7629491	1	4	1	1	2	2	0	0	0	10	86	26	1.38	4.9	2.69	1.89901	0.81	0	0	6.80556	27.0401
FF	Ba3_FF	421008	7629585	1	0	0	0	0	1	1	0	0	8	149	26	0	2.35	2.97	2.59047	-1	0	0	0	8.17672
FF	Ba3_FF	421008	7629585	2	0	0	0	0	0	1	0	0	8	149	26	0	2.35	2.97	2.59047	-1	0	0	0	8.17672
FF	Ba4_FF	421077	7629502	1	0	0	0	0	1	0	0	0	12	96	26	3.27	2.93	2.5	2.64707	0.61	0	0	1.86568	19.1292
FF	Ba4_FF	421077	7629502	2	0	0	0	0	1	0	0	0	12	96	26	3.27	2.93	2.5	2.64707	0.61	0	0	1.86568	19.1292
FF	Er1_FF	421456	7629307	1	4	0	0	1	0	0	0	1	10	31	0.6	14.71	10.54	5.76	4.51014	0.81	0.012207	9.82203	7.72108	5.55791
FF	Er1_FF	421456	7629307	2	1	0	1	0	0	0	0	1	10	31	0.6	14.71	10.54	5.76	4.51014	0.81	0.012207	9.82203	7.72108	5.55791
FF	Ja1_FF	421462	7629321	2	1	0	1	0	0	0	0	1	9	25	3	20.33	9.1	5.67	4.63774	0.79	0	7.047	7.23627	5.26173
FF	Ja1_FF	421462	7629321	1	2	1	1	0	0	0	0	1	9	25	3	20.33	9.1	5.67	4.63774	0.79	0	7.047	7.23627	5.26173
FF	Ju1_FF	421655	7629409	1	9	0	0	4	2	0	0	0	16	47	3	12.88	6.97	5.08	3.84378	0.84	0	0	11.032	12.489
FF	Ju1_FF	421655	7629409	2	0	0	0	0	1	0	0	0	16	47	3	12.88	6.97	5.08	3.84378	0.84	0	0	11.032	12.489
FF	Ju2_FF	421420	7629281	2	0	0	0	0	0	0	0	0	19	0	0.6	14.11	9.77	5.35	4.45372	0.85	0.788151	19.0449	8.58752	6.68965
FF	Ju2_FF	421420	7629281	1	2	0	0	2	1	0	0	0	19	0	0.6	14.11	9.77	5.35	4.45372	0.85	0.788151	19.0449	8.58752	6.68965
FF	Ju3_FF	421588	7629438	1	0	0	0	0	1	0	0	1	19	86	3	4.31	8.61	6.66	4.93556	0.57	0	0	2.22448	5.44799
FF	Ju3_FF	421588	7629438	2	0	0	0	0	3	0	0	1	19	86	3	4.31	8.61	6.66	4.93556	0.57	0	0	2.22448	5.44799
FF	Ju4_FF	421432	7629408	2	1	0	1	0	1	0	0	0	5	103	3	0	4.57	5.5	4.53889	-1	0	0	0	3.81746
FF	Ju4_FF	421432	7629408	1	4	0	2	1	0	0	0	0	5	103	3	0	4.57	5.5	4.53889	-1	0	0	0	3.81746
FL	Ba1_FL	378693	7635328	1	6	0	2	2	1	0	0	0	25	37	0.57	0.7	2.79	2.61	2.45719	0.91	0	1.45659	11.8845	4.63337
FL	Ba1_FL	378693	7635328	2	9	0	7	2	3	0	0	0	25	37	0.57	0.7	2.79	2.61	2.45719	0.91	0	1.45659	11.8845	4.63337
FL	Ba2_FL	378571	7635374	2	1	0	1	0	4	0	0	0	4	0	0.57	15.06	4.28	1.97	1.31294	0.93	0.833988	37.48	18.5335	4.63337
FL	Ba2_FL	378571	7635374	1	0	0	0	0	1	0	0	0	4	0	0.57	15.06	4.28	1.97	1.31294	0.93	0.833988	37.48	18.5335	4.63337
FL	Ba3_FL	378598	7635401	2	1	0	1	0	1	0	0	0	4	0	0.57	14.99	4.25	2.32	1.47511	0.92	0.633707	40.0897	18.4751	4.63337
FL	Ba3_FL	378598	7635401	1	0	0	0	0	0	0	0	0	4	0	0.57	14.99	4.25	2.32	1.47511	0.92	0.633707	40.0897	18.4751	4.63337
FL	Ba4_FL	378616	7635324	2	0	0	0	0	0	0	0	0	4	0	0.57	15.06	4.97	2.74	1.7107	0.92	0.752827	36.4031	18.5335	4.63337
FL	Ba4_FL	378616	7635324	1	6	0	1	5	0	0	0	0	4	0	0.57	15.06	4.97	2.74	1.7107	0.92	0.752827	36.4031	18.5335	4.63337
FL	Cris1_FL	378403	7635515	1	1	0	0	1	0	1	0	0	3	202	0.57	8.3	8.53	4.26	1.57243	-1	0	0	0	0
FL	Cris1_FL	378403	7635515	2	4	0	0	4	8	1	0	0	3	202	0.57	8.3	8.53	4.26	1.57243	-1	0	0	0	0
FL	Cris2_FL	378356	7635460	1	2	0	0	2	0	0	0	0	8	215	0.57	14.94	6.91	3.88	1.49254	-1	0	0	0	0
FL	Cris2_FL	378356	7635460	2	7	0	0	0	0	0	0	0	8	215	0.57	14.94	6.91	3.88	1.49254	-1	0	0	0	0
FL	Cris3_FL	378218	7635661	1	0	0	0	0	0	0	1	0	6	152	18	0	2	1.46	2.10844	-1	0	0	0	3.80495
FL	Cris3_FL	378218	7635661	2	1	0	0	1	0	0	1	0	6	152	18	0	2	1.46	2.10844	-1	0	0	0	3.80495
FL	Cris4_FL	378043	7635635	2	4	0	0	4	0	0	0	0	5	288	18	3.91	2.93	2.33	3.59053	-1	0	0	0	0
FL	Cris4_FL	378043	7635635	1	0	0	0	0	0	0	0	0	5	288	18	3.91	2.93	2.33	3.59053	-1	0	0	0	0
FL	Ja1_FL	378379	7636023	2	0	0	0	0	0	0	0	0	7	11	18	16.07	8.95	9.2	9.60544	0.83	0.338976	21.376	11.4877	31.5191
FL	Ja1_FL	378379	7636023	1	0	0	0	0	0	0	0	0	7	11	18	16.07	8.95	9.2	9.60544	0.83	0.338976	21.376	11.4877	31.5191
FL	Ja2_FL	378359	7636166	1	0	0	0	0	0	0	0	0	8	93	18	15.15	4.51	3.02	4.22489	0.09	0	0	0.21505	9.46858
FL	Ja2_FL	378359	7636166	2	0	0	0	0	0	0	0	0	8	93	18	15.15	4.51	3.02	4.22489	0.09	0	0	0.21505	9.46858
MT	Ba1_MT	408660	7621068	2	2	0	0	0	7	0	0	0	8	343	3	15.14	9.68	4.14	1.99311	-1	0	0	0	0
MT	Ba1_MT	408660	7621068	1	2	0	0	0	1	0	0	0	8	343	3	15.14	9.68	4.14	1.99311	-1	0	0	0	0
MT	Ba2_MT	408696	7621136	1	1	0	1	0	0	0	0	1	4	371	3	12.9	4.05	2.23	1.6201	-1	0	0	0	0
MT	Ba2_MT	408696	7621136	2	1	0	1	0	2	0	0	1	4	371	3	12.9	4.05	2.23	1.6201	-1	0	0	0	0
MT	Ba3_MT	408751	7621210	1	1	0	0	1	3	0	0	0	5	304	0.65	12.91	4.46	2.26	1.25415	-1	0	0	0	0
MT	Ba3_MT	408751	7621210	2	3	0	0	3	1	0	0	0	5	304	0.65	12.91	4.46	2.26	1.25415	-1	0	0	0	0
MT	Cris1_MT	408683	7621603	2	16	0	2	14	1	1	1	0	30	15	46	0.05	2.23	0.84	0.411976	0.96	0.222562	33.11	44.5452	53.127
MT	Cris1_MT	408683	7621603	1	7	1	2	4	0	1	1	0	30	15	46	0.05	2.23	0.84	0.411976	0.96	0.222562	33.11	44.5452	53.127
MT	Cris2_MT	408694	7621654	2	4	0	0	2	0	0	0	0	10	0	46	0	0	0.51	0.245809	0.97	1.5625	92.3954	75.7273	69.8759
MT	Cris2_MT	408694	7621654	1	1	0	0	0	0	0	0	0	10	0	46	0	0	0.51	0.245809	0.97	1.5625	92.3954	75.7273	69.8759
MT	Cris3_MT	408694	7621496	1	0	0	0	0	0	0	0	0	15	118	46	0	2.03	1.62	1.02091	-1	0	0	0	17.9132
MT	Cris3_MT	408694	7621496	2	4	2	2	0	0	0	0	0	15	118	46	0	2.03	1.62	1.02091	-1	0	0	0	17.9132
MT	Cris4_MT	408694	7621654	1	6	0	5	0	0	0	0	1	20	0	46	0	0	0.51	0.245809	0.97	1.5625	92.3954	75.7273	69.8759
MT	Cris4_MT	408694	7621654	2	12	0	9	1	0	0	0	1	20	0	46	0	0	0.51	0.245809	0.97	1.5625	92.3954	75.7273	69.8759
MT	Ju1_MT	408745	7621417	2	1	0	0	1	0	0	0	0	7	185	46	0	1.62	1.52	1.37447	-1	0	0	0	1.03992
MT	Ju1_MT	408745	7621417	1	3	0	0	1	0	0	0	0	7	185	46	0	1.62	1.52	1.37447	-1	0	0	0	1.03992
MT	Ju2_MT	408690	7621403	1	3	0	0	1	0	0	1	0	8	211	46	11.84	7.44	3.32	1.52042	-1	0	0	0	0
MT	Ju2_MT	408690	7621403	2	0	0	0	0	0	0	1	0	8	211	46	11.84	7.44	3.32	1.52042	-1	0	0	0	0
MT	Ju3_MT	408729	7621317	2	5	0	1	4	0	0	0	0	10	287	46	5.9	5.58	3	1.58536	0	0	0	0	0
MT	Ju3_MT	408729	7621317	1	21	0	1	11	0	0	0	0	10	287	46	5.9	5.58	3	1.58536	0	0	0	0	0
FM	Cris1_FM	403410	7625475	1	1	0	0	1	1	0	0	0	6	237	11	0	1.45	0.78	0.341171	0	0	0	0	0
FM	Cris1_FM	403410	7625475	2	0	0	0	0	0	0	0	0	6	237	11	0	1.45	0.78	0.341171	0	0	0	0	0
FM	Cris2_FM	404017	7625583	2	1	0	0	1	0	1	1	0	12	57	1	25.6	19.4	10.73	4.8265	0.86	0	0	14.8575	31.1997
FM	Cris2_FM	404017	7625583	1	1	0	1	0	0	1	1	0	12	57	1	25.6	19.4	10.73	4.8265	0.86	0	0	14.8575	31.1997
FM	Cris3_FM	404151	7625793	2	1	0	1	0	1	0	0	0	5	71	11	2.32	2.74	1.98	4.52067	0.75	0	0	5.57294	21.6331
FM	Cris3_FM	404151	7625793	1	1	0	1	0	0	0	0	0	5	71	11	2.32	2.74	1.98	4.52067	0.75	0	0	5.57294	21.6331
FM	Ja1_FM	403804	7625484	2	0	0	0	0	0	0	0	0	13	47	11	0.56	2.43	1.29	1.0322	0.91	0	2.15929	38.8719	35.1788
FM	Ja1_FM	403804	7625484	1	0	0	0	0	0	0	0	0	13	47	11	0.56	2.43	1.29	1.0322	0.91	0	2.15929	38.8719	35.1788
FM	Ja2_FM	404032	7625671	1	0	0	0	0	0	0	0	0	10	20	1	4.82	5.97	4.71	3.38362	0.87	0.056954	28.2872	49.5904	40.3826
FM	Ja2_FM	404032	7625671	2	1	0	0	1	0	0	0	0	10	20	1	4.82	5.97	4.71	3.38362	0.87	0.056954	28.2872	49.5904	40.3826
FM	Ja3_FM	404161	7635740	1	0	0	0	0	0	0	0	0	6	134	77	5.02	7.85	4.88	5.24994	-1	0	0	0	9.06104
FM	Ja3_FM	404161	7635740	2	1	0	0	1	0	0	0	0	6	134	77	5.02	7.85	4.88	5.24994	-1	0	0	0	9.06104
FM	Ju1_FM	403510	7625062	1	3	0	2	1	1	1	0	0	10	61	40	0	1.98	1.88	1.70673	0.91	0	0	11.542	27.5797
FM	Ju1_FM	403510	7625062	2	0	0	0	0	1	1	0	0	10	61	40	0	1.98	1.88	1.70673	0.91	0	0	11.542	27.5797
FM	Ju2_FM	403628	7625125	2	1	0	0	0	0	0	1	0	8	0	40	0.07	2.24	0.84	0.70097	0.97	1.5625	90.7134	69.6877	36.7519
FM	Ju2_FM	403628	7625125	1	4	0	0	3	0	0	1	0	8	0	40	0.07	2.24	0.84	0.70097	0.97	1.5625	90.7134	69.6877	36.7519
FM	Ju3_FM	403582	7625018	2	2	1	0	1	1	0	0	1	13	0	40	1.5	2.62	1.04	1.14658	0.97	1.28657	67.435	56.6645	44.2235
FM	Ju3_FM	403582	7625018	1	2	0	1	1	1	0	0	1	13	0	40	1.5	2.62	1.04	1.14658	0.97	1.28657	67.435	56.6645	44.2235
FM	Ju4_FM	403528	7624937	1	0	0	0	0	0	1	0	0	10	39	40	0	2.3	2.28	1.89069	0.93	0	5.7637	22.5467	37.4788
FM	Ju4_FM	403528	7624937	2	0	0	0	0	3	1	0	0	10	39	40	0	2.3	2.28	1.89069	0.93	0	5.7637	22.5467	37.4788
FT	Ba1_FT	418371	7628802	2	3	0	1	2	0	0	0	0	3	33	3	0	2.4	2.36	1.70455	0.96	0.139372	26.6572	31.6431	17.7791
FT	Ba1_FT	418371	7628802	1	0	0	0	0	0	0	0	0	3	33	3	0	2.4	2.36	1.70455	0.96	0.139372	26.6572	31.6431	17.7791
FT	Ba2_FT	418383	7628870	2	0	0	0	0	1	0	0	0	4	64	3	0	1.6	2.59	1.71413	0.91	0	0.538071	13.7906	13.042
FT	Ba2_FT	418383	7628870	1	2	0	0	2	2	0	0	0	4	64	3	0	1.6	2.59	1.71413	0.91	0	0.538071	13.7906	13.042
FT	Ba3_FT	418448	7629145	2	2	0	1	1	2	0	0	0	10	40	9	0	3.28	2.23	0.7284	0.94	0	3.76981	13.7342	19.7815
FT	Ba3_FT	418448	7629145	1	0	0	0	0	0	0	0	0	10	40	9	0	3.28	2.23	0.7284	0.94	0	3.76981	13.7342	19.7815
FT	Ja1_FT	418848	7629011	2	4	0	1	3	0	0	0	0	13	181	1	1.45	2.61	0.87	0.30141	0	0	0	0	7.28879
FT	Ja1_FT	418848	7629011	1	0	0	0	0	0	0	0	0	13	181	1	1.45	2.61	0.87	0.30141	0	0	0	0	7.28879
FT	Ja2_FT	418948	7629165	2	2	0	1	1	0	0	0	0	10	15	1	29.68	9.79	3.66	1.59099	0.97	0.233703	21.4917	24.2975	21.442
FT	Ja2_FT	418948	7629165	1	0	0	0	0	0	0	0	0	10	15	1	29.68	9.79	3.66	1.59099	0.97	0.233703	21.4917	24.2975	21.442
FT	Ja3_FT	418984	7629182	1	0	0	0	0	0	0	0	0	6	0	1	11.36	5.54	3.61	1.58891	0.97	1.19779	49.8979	31.7243	16.8069
FT	Ja3_FT	418984	7629182	1	0	0	0	0	0	0	0	0	6	0	1	11.36	5.54	3.61	1.58891	0.97	1.19779	49.8979	31.7243	16.8069
FT	Ju1_FT	418271	7628644	1	2	0	1		2	0	0	0	13	0	3	0	4.25	3.01	1.61661	0.95	1.48776	75.4503	48.6234	23.7958
FT	Ju1_FT	418271	7628644	2	0	0	0	0	0	0	0	0	13	0	3	0	4.25	3.01	1.61661	0.95	1.48776	75.4503	48.6234	23.7958
FT	Ju2_FT	418311	7628684	1	4	1	0	2	0	0	1	0	7	0	3	0	2.86	2.1	1.38541	0.96	1.5625	84.5751	51.3849	23.9076
FT	Ju2_FT	418311	7628684	2	1	0	0	1	0	0	1	0	7	0	3	0	2.86	2.1	1.38541	0.96	1.5625	84.5751	51.3849	23.9076
FT	Ju3_FT	418248	7628859	1	2	0	0	0	0	1	0	0	10	25	3	0.16	6.25	3.81	2.42973	0.95	0.042868	18.5809	24.9773	14.5388
FT	Ju3_FT	418248	7628859	2	0	0	0	0	0	1	0	0	10	25	3	0.16	6.25	3.81	2.42973	0.95	0.042868	18.5809	24.9773	14.5388
FT	Ju4_FT	418302	7628839	1	0	0	0	0	0	0	0	0	6	0	3	0	2.73	4.23	2.5237	0.95	1.54413	71.8589	38.1677	16.3616
FT	Ju4_FT	418302	7628839	2	1	0	1	0	0	0	0	0	6	0	3	0	2.73	4.23	2.5237	0.95	1.54413	71.8589	38.1677	16.3616
GL	Ba1_GL	404161	7635307	1	0	0	0	0	0	0	0	0	5	24	77	7.73	3.61	2.09	1.45252	0.91	0.002363	25.8823	47.8235	65.7138
GL	Ba1_GL	404161	7635307	2	6	0	0	0	0	0	0	0	5	24	77	7.73	3.61	2.09	1.45252	0.91	0.002363	25.8823	47.8235	65.7138
GL	Ba2_GL	404353	7635356	2	3	0	2	1	2	1	0	0	5	26	77	13.11	11.9	7.91	4.18794	0.86	0	8.52638	26.6061	49.0874
GL	Ba2_GL	404353	7635356	1	1	0	0	1	1	1	0	0	5	26	77	13.11	11.9	7.91	4.18794	0.86	0	8.52638	26.6061	49.0874
GL	Ba3_GL	404365	7635407	2	3	0	3	0	1	0	0	0	5	29	77	4	4	4.54	4.56334	0.91	0	11.0678	27.5512	39.0929
GL	Ba3_GL	404365	7635407	1	1	0	1	0	0	0	0	0	5	29	77	4	4	4.54	4.56334	0.91	0	11.0678	27.5512	39.0929
GL	Cris1_GL	404273	7635080	2	2	0	1	1	0	0	0	1	18	10	77	14.84	4.31	1.63	0.85197	0.87	0.497956	28.8519	39.1969	47.2064
GL	Cris1_GL	404273	7635080	1	4	0	3	0	0	0	0	1	18	10	77	14.84	4.31	1.63	0.85197	0.87	0.497956	28.8519	39.1969	47.2064
GL	Cris2_GL	404236	7635089	1	0	0	0	0	0	0	0	1	20	19	77	15.06	4.43	1.64	0.900581	0.86	0.046266	8.90389	32.2715	47.7502
GL	Cris2_GL	404236	7635089	2	1	1	0	0	0	0	0	1	20	19	77	15.06	4.43	1.64	0.900581	0.86	0.046266	8.90389	32.2715	47.7502
GL	Cris3_GL	404287	7635185	1	2	0	1	0	0	0	0	1	12	0.7	77	14.89	3.79	0.95	1.02038	0.93	0.962577	65.4756	68.342	50.7751
GL	Cris3_GL	404287	7635185	2	1	0	1	0	0	0	0	1	12	0.7	77	14.89	3.79	0.95	1.02038	0.93	0.962577	65.4756	68.342	50.7751
GL	Ju1_GL	404163	7635185	2	3	0	0	2	1	0	0	0	10	45	77	1.46	2.61	0.87	0.761192	0.88	0	0.493126	22.7278	59.7307
GL	Ju1_GL	404163	7635185	1	2	0	2	0	0	0	0	0	10	45	77	1.46	2.61	0.87	0.761192	0.88	0	0.493126	22.7278	59.7307
GL	Ju2_GL	404269	7635333	2	9	0	1	8	0	0	0	0	7	37	77	14.52	11.41	6.35	3.36633	0.88	0	9.9617	42.5271	56.6158
GL	Ju2_GL	404269	7635333	1	0	0	0	0	0	0	0	0	7	37	77	14.52	11.41	6.35	3.36633	0.88	0	9.9617	42.5271	56.6158
GL	Ju3_GL	404413	7635315	1	2	0	0	2	0	0	0	0	6	26	77	9.26	7.61	5.55	3.33744	0.93	0.131637	28.1613	40.2412	52.5161
GL	Ju3_GL	404413	7635315	2	5	0	1	3	1	0	0	0	6	26	77	9.26	7.61	5.55	3.33744	0.93	0.131637	28.1613	40.2412	52.5161

## Sheet: TableS2
Table S2. Legend description of database used in the generalized mixed-effect models (GLMM). We used these models to examine how fine landscape scale context influence in the frequence of bird use scattered trees.
Legend of database	Description
ID_large_landscape	Large scale landscape sites considering 1.5 km-buffers around the centroid of the focal forest fragment
ID_fine_landscape	Fine scale landscape, considering the sampling scattered trees as central of landscapeand defining concentric circular buffers of varying radii that represent two spatial scale: 25-, 50-, 100-, 200-m radius.
longitude	Coordinate system WGS_1984_UTM_Zone_23S
latitude	Coordinate system WGS_1984_UTM_Zone_23S
time	Identification of the repeat observation in each sampling scattered tree (twice observations)
all_specie	Number of bird individuals that perched on sampling scattered trees
high	Number of high forest dependent species that perched on sampling scattered trees
medium	Number of medium forest dependent species that perched on sampling scattered trees
low	Number of low forest dependent species that perched on sampling scattered trees
n_predator	Predator abundance seen or heard using point counts, and during the same time of sampling scattered trees, considering a circular buffer radium = 50-m around the sampling tree
food_resource_flower	Presence/absence of flowers in the scattered trees
food_resource_fruit	Presence/absence of fruits in the scattered trees
nest	Presence/absence of nest in the scattered tree
tree_size	Tree height (m)
frag_distance	Euclidean distance (m) from the nearest edge of forest fragment to the sampling scattered tree.
frag_size	Size of the nearest forest fragment (ha).
tree_density25	Kernel density of scattered trees (n/ha) in a neighborhood around the sampling scattered tree, considering circular buffer radium= 25m around sampling scattered tree
tree_density50	Kernel density of scattered trees (n/ha) in a neighborhood around the sampling scattered tree, considering circular buffer radium= 50m around sampling scattered tree
tree_density100	Kernel density of scattered trees (n/ha) in a neighborhood around the sampling scattered tree, considering circular buffer radium= 100m around sampling scattered tree
tree_density200	Kernel density of scattered trees (n/ha) in a neighborhood around the sampling scattered tree, considering circular buffer radium= 200m around sampling scattered tree
tree_aggregation	This index expresses the aggregation condition of scattered trees, and ranges from -1≤ to ≤ 1. -1 represents a maximum disaggregation (greater dispersion), 0 random distribution, and 1 maximum clumpiness, considering circular buffer radium = 100m around sampling scattered tree.
forest_cover_amount25	Proportion of landscape (%) occupied by forest and ranges from 0% ≤ to ≤ 100%, considering circular buffers radium= 25m around sampling scattered tree.
forest_cover_amount50	Proportion of landscape (%) occupied by forest and ranges from 0% ≤ to ≤ 100%, considering circular buffers radium= 50m around sampling scattered tree.
forest_cover_amount100	Proportion of landscape (%) occupied by forest and ranges from 0% ≤ to ≤ 100%, considering circular buffers radium= 100m around sampling scattered tree.
forest_cover_amount200	Proportion of landscape (%) occupied by forest and ranges from 0% ≤ to ≤ 100%, considering circular buffers radium= 200m around sampling scattered tree.

## Sheet: Table S3
TableS3 - Species recorded in gap-crossing in open matrices, landing on scattered trees, and as potetial predators. All bird species were classified by forest habitat specialization (high, medium and low dependence) according the description in del Hoyo et al. (2014, 2016).
Species	Family	Habitat specialization*	Gap-crossing	Landing_on_scattered tree	Predators
Amazilia_lactea	Trochilidae	medium	1	1
Amazilia_versicolor	Trochilidae	medium	1	1
Antilophia_galeata	Pipridae	high		1
Aramides_saracura	Rallidae	medium	1
Aratinga_auricapillus	Psittacidae	medium		1
Automolus_leucophthalmus	Furnariidae	high		1
Buteo_brachyurus*	Accipitridae	medium			1
Buteogallus_meridionalis*	Accipitridae	low			1
Camptostoma_obsoletum	Tyrannidae	low		1
Caracara_plancus*	Falconidae	low	1	1	1
Chiroxiphia_caudata	Pipridae	high	1
Chlorostilbon_lucidus	Trochilidae	medium		1
Coereba_flaveola	Thraupidae	low	1	1
Colaptes_campestris	Picidae	medium		1
Colaptes_melanochloros	Picidae	medium		1
Colonia_colonus	Tyrannidae	medium	1	1
Columbina_squammata	Columbidae	low	1
Columbina_talpacoti	Columbidae	low	1	1
Conopophaga_lineata	Conopophagidae	medium	1	1
Coragyps_atratus*	Cathartidae	low	1	1
Cyanocorax_chrysops	Corvidae	medium	1	1
Cyanoloxia_brissonii	Cardinalidae	low	1
Donacobius_atricapilla	Donacobiidae	low	1
Drymophila_ferruginea	Thamnophilidae	high	1
Dryocopus_lineatus	Picidae	low	1
Elaenia_flavogaster	Tyrannidae	low		1
Elaenia_mesoleuca	Tyrannidae	high	1
Eupetomena_macroura	Trochilidae	low		1
Eupsittula_aurea	Psittacidae	medium		1
Falco_femoralis*	Falconidae	low			1
Fluvicola_nengeta	Tyrannidae	medium		1
Forpus_xanthopterygius	Psittacidae	medium		1
Furnarius_rufus	Furnariidae	low		1
Geranoaetus_albicaudatus*	Accipitridae	low	1		1
Gnorimopsar_chopi	Icteridae	low		1
Heliothryx_auritus	Trochilidae	high	1
Herpetotheres_cachinnans*	Falconidae	low			1
Ictinia_plumbea*	Accipitridae	medium			1
Knipolegus_cyanirostris	Tyrannidae	medium	1
Lathrotriccus_euleri	Tyrannidae	medium		1
Lepidocolaptes_angustirostris	Dendrocolaptidae	low		1
Mionectes_rufiventris	Rhynchocyclidae	high		1
Myiarchus_ferox	Tyrannidae	medium		1
Patagioenas_cayennensis	Columbidae	medium	1
Patagioenas_picazuro	Columbidae	medium		1
Penelope_obscura	Cracidae	medium		1
Phacellodomus_rufifrons	Furnariidae	low	1	1
Phaethornis_eurynome	Trochilidae	high	1
Phaethornis_pretrei	Trochilidae	medium	1	1
Picumnus_cirratus	Picidae	medium		1
Pitangus_sulphuratus	Tyrannidae	low	1	1
Platyrinchus_mystaceus	Platyrinchidae	medium		1
Pseudoleistes_guirahuro	Icteridae	low		1
Psittacara_leucophthalmus	Psittacidae	medium	1	1
Pygochelidon_cyanoleuca	Hirundinidae	low		1
Pyriglena_leucoptera	Thamnophilidae	medium		1
Pyrrhura_frontalis	Psittacidae	medium	1
Ramphastos_toco	Ramphastidae	medium	1	1	1
Rupornis_magnirostris*	Accipitridae	low	1		1
Saltator_similis	Thraupidae	medium		1
Sicalis_flaveola	Thraupidae	low	1	1
Sittasomus_griseicapillus	Dendrocolaptidae	medium		1
Spinus_magellanicus	Fringillidae	low		1
Sporophila_caerulescens	Thraupidae	low		1
Synallaxis_spixi	Furnariidae	low	1	1
Tachyphonus_coronatus	Thraupidae	medium	1	1
Tangara_cayana	Thraupidae	low	1	1
Tangara_sayaca	Thraupidae	low		1
Tersina_viridis	Thraupidae	medium		1
Thalurania_glaucopis	Trochilidae	medium	1
Turdus_leucomelas	Turdidae	medium		1
Turdus_rufiventris	Turdidae	low	1	1
Tyrannus_melancholicus	Tyrannidae	low	1
Tyrannus_savana	Tyrannidae	low	1
Veniliornis_passerinus	Picidae	high		1
Volatinia_jacarina	Thraupidae	low	1
Xolmis_velatus	Tyrannidae	low		1
Zonotrichia_capensis	Passerellidae	low	1	1
* We excluded the raptors and vultures data as response variables (number of gap-crossing events and number of bird visits) , due their particularities in the movement behaviour in the matrix that differ from the rest of community. We used the raptors dataset from point couint data as predictive variable.
